# Supplementary material for: Solid phase extraction based on trimethylsilyloxy silica aerogel
Source: Royal Society of Chemistry journal article supplement (doi:10.1039/d1ra01803e), 2021-01-01
Supplement: d1ra01803e1.pdf [file d1ra01803e1.pdf]

## Supporting Information

### Solid-phase extraction based on trimethylsilyloxy silica aerogel

V. Lakshmi Prasanna, Igal Gozlan, Aviv Kaplan, Daniel Zachor-Movshovitz and Dror Avisar\*

*The Water Research Center, The Hydro-Chemistry Laboratory, Porter School for Environment and Earth Sciences, Raymond and Beverly Sackler Faculty of Exact Sciences, Tel Aviv University, Tel Aviv 69978, Israel*

\*Corresponding author: E-mail address: [droravi@tauex.tau.ac.il](mailto:droravi@tauex.tau.ac.il) (Dror Avisar).

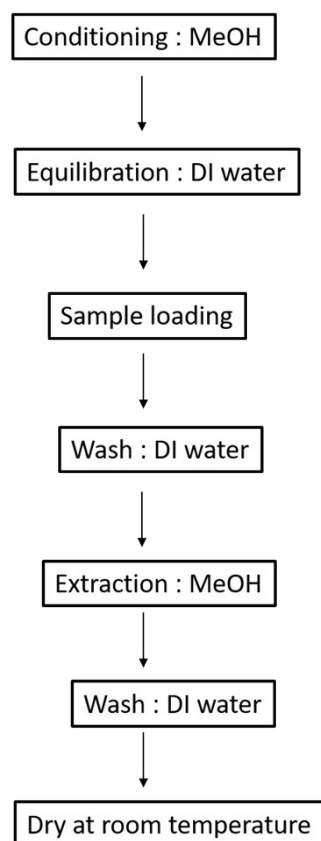

Fig. S1: Protocol for extraction of chemotherapeutic drugs on TMSO modified silica aerogel

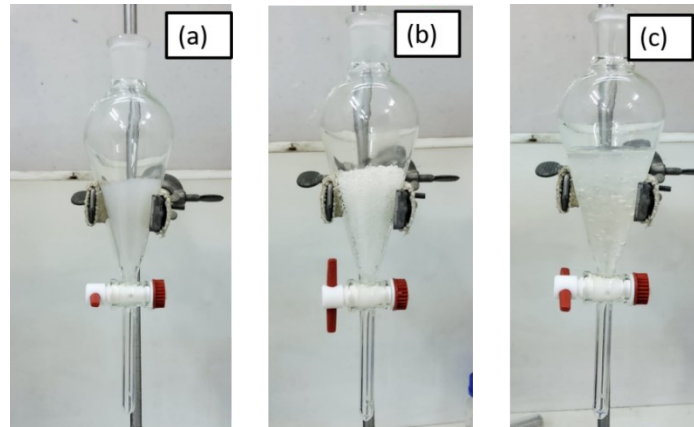

Figure S2: Aerogel in separating funnel (a) without conditioning with MeOH (b) after conditioning with MeOH (c) sample loading

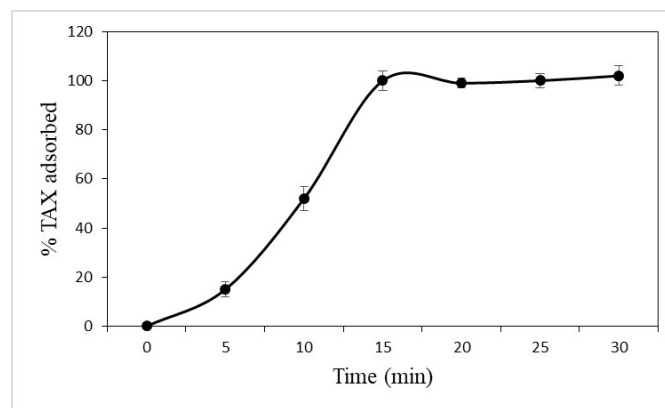

Figure S3 Kinetics of adsorption of paclitaxel (TAX) on aerogel

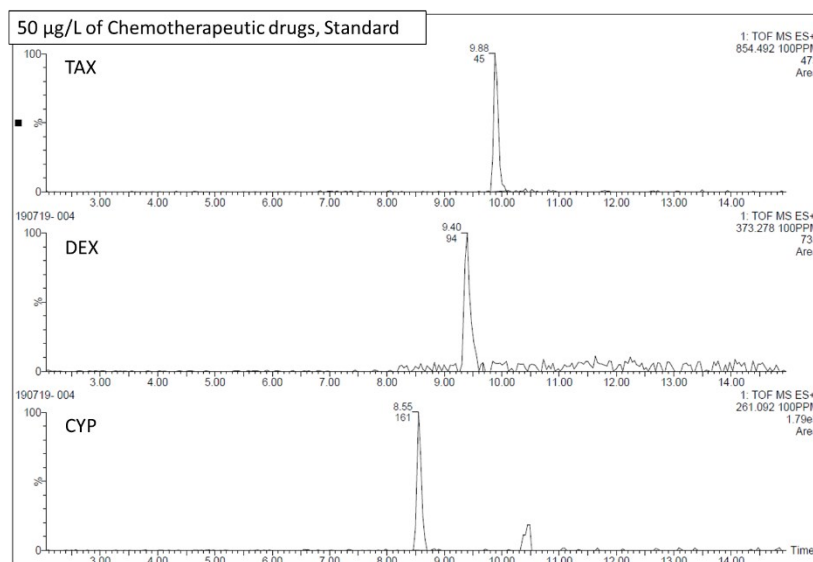

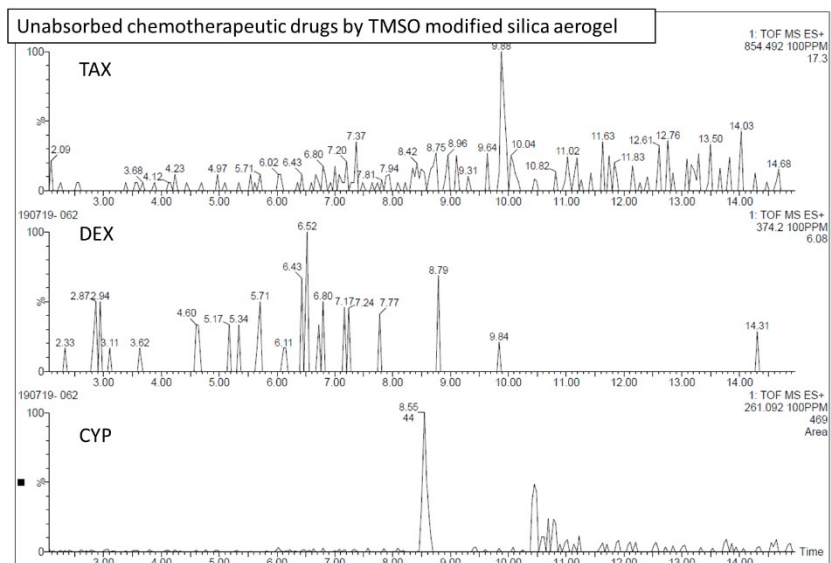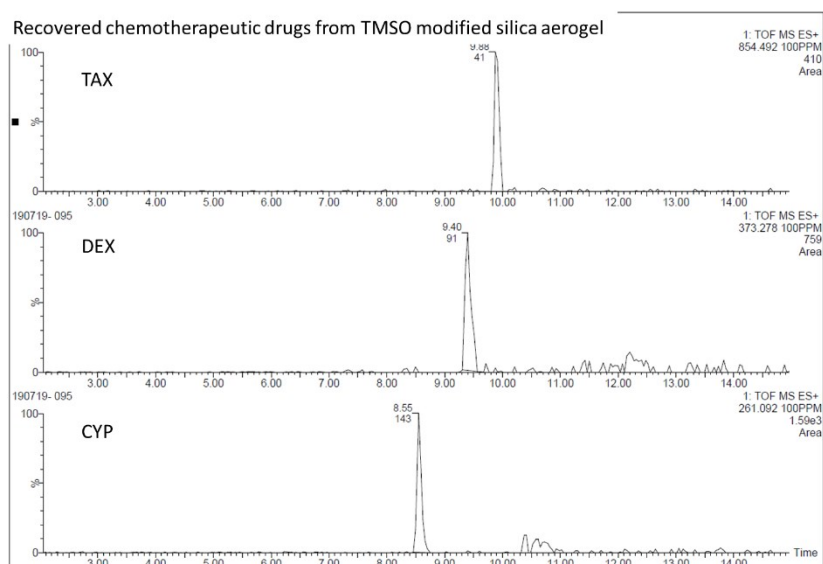

Figure S4: LC-MS of Drugs unabsorbed and recovered drugs by TMSO modified silica aerogel

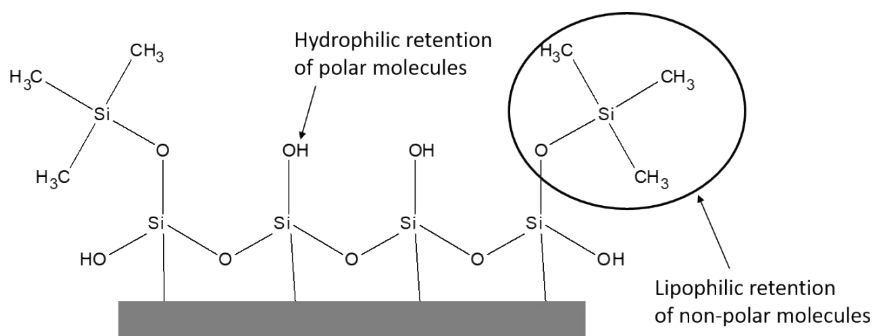

Fig. S5: Molecular interactions of polar and non-polar molecules on TMSO modified silica aerogel

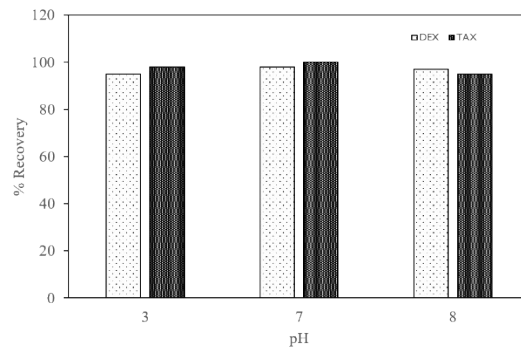

**Fig. S6** Effect of pH on recovery of chemotherapeutic drugs dexamethasone (DEX) and paclitaxel (TAX).

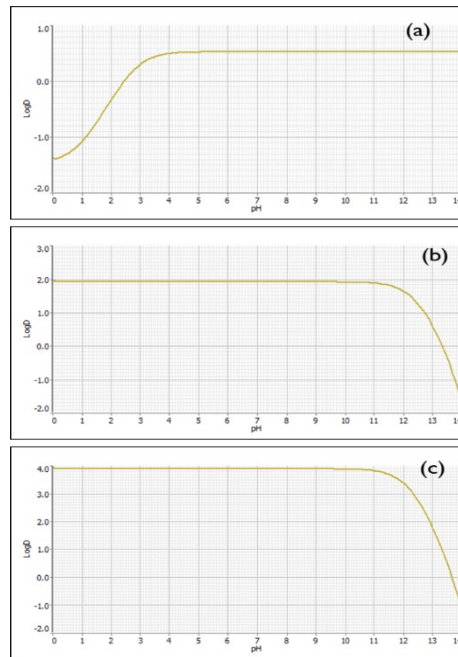

**Fig. S7** Log D of (a) cyclophosphamide (CYP), (b) dexamethasone (DEX), and (c) paclitaxel (TAX)

**Table S1** Physiochemical properties of cyclophosphamide (CYP), dexamethasone (DEX) and paclitaxel (TAX)

|                            | <b>CYP</b>                                                                     | <b>DEX</b>                                      | <b>TAX</b>                                       |
|----------------------------|--------------------------------------------------------------------------------|-------------------------------------------------|--------------------------------------------------|
| CAS number                 | 50-18-0                                                                        | 50-02-2                                         | 33069-62-4                                       |
| Chemical formula           | C <sub>7</sub> H <sub>15</sub> Cl <sub>2</sub> N <sub>2</sub> O <sub>2</sub> P | C <sub>22</sub> H <sub>29</sub> FO <sub>5</sub> | C <sub>47</sub> H <sub>51</sub> NO <sub>14</sub> |
| Monoisotopic mass<br>(Da)  | 260.02                                                                         | 392.19                                          | 853.3                                            |
| Melting point (°C)         | 48                                                                             | 262                                             | 216–217                                          |
| Boiling point (°C)         | 336                                                                            |                                                 | 957.1                                            |
| Water solubility<br>(mg/L) | 93                                                                             | 89                                              | 5                                                |
| pKa                        | 2.84                                                                           | 12.4                                            | 10.3                                             |
| Log P                      | 0.63                                                                           | 1.92                                            | 3.18                                             |

Table S2: Comparison of TMSO modified silica aerogel with other commercial cartridges on extraction of chemotherapeutic drugs from water

|            | <b>HLB</b> | <b>RP</b> | <b>C18</b> | <b>Strata XC</b> | <b>TMSO modified silica aerogel</b> |
|------------|------------|-----------|------------|------------------|-------------------------------------|
| <b>CYP</b> | 99.9       | 96        | 92         | 111              | 70                                  |
| <b>TAX</b> | 71         | 68        | 63         | 81               | 109                                 |
| <b>DEX</b> | 102        | 104       | 98         | 114              | 102                                 |
